# Supplementary material for: Meteorologically Driven Simulations of Dengue Epidemics in San Juan, PR
Source: PubMed Central journal article supplement (PMC4537107; doi:10.1371/journal.pntd.0004002), 2015-08-14
Supplement: pntd.0004002.s001.pdf [file pntd.0004002.s001.pdf]

| Parameter                                                                     | Temp Range (°C)        | Equation/Constant                               | Source(s)                                    |
|-------------------------------------------------------------------------------|------------------------|-------------------------------------------------|----------------------------------------------|
| Egg Development: $E_d$<br>(proportion of stage completed per day)             | $T < 14.5, T > 36$     | 0                                               | Eisen et al. 2014                            |
|                                                                               | $14.5 \leq T \leq 31$  | $0.0012 * T - 0.0171$                           |                                              |
|                                                                               | $31 < T \leq 35$       | $-0.0002 * T + 0.0268$                          |                                              |
|                                                                               | $35 < T \leq 36$       | $-0.0198 * T + 0.7128$                          |                                              |
| Egg Survival: $E_s$<br>(Proportion surviving each day)                        | $T \leq 0, T \geq 38$  | 0                                               | Eisen et al. 2014                            |
|                                                                               | $0 < T < 15$           | $0.071 * T - .071$                              |                                              |
|                                                                               | $15 \leq T < 32$       | 0.98                                            |                                              |
|                                                                               | $32 \leq T < 38$       | $-0.0141 * T^2 + 0.8278 * T - 11.096$           |                                              |
| Minimum Egg Hatching Temperature: $E_m$                                       |                        | 14°C                                            | Christophers 1960                            |
| Larva Development: $L_d$<br>(proportion of stage completed per day)           | $T \leq 14, T > 38$    | 0                                               | Eisen et al. 2014                            |
|                                                                               | $14 < T < 36$          | $0.0076 * \ln(T) - 0.0192$                      |                                              |
|                                                                               | $36 \leq T \leq 38$    | $-0.0027 * T + 0.1041$                          |                                              |
| Larva Density Independent Survival: $L_s$<br>(Proportion surviving each day)  | $T \leq 4, T \geq 38$  | 0                                               | Eisen et al. 2014                            |
|                                                                               | $4 < T < 15$           | $0.0876 * T - .3502$                            |                                              |
|                                                                               | $15 \leq T < 35$       | 0.98                                            |                                              |
|                                                                               | $35 \leq T < 38$       | $-0.1863 * T + 7.4581$                          |                                              |
| Larva Density Dependent Survival: $L_{ds}$<br>(Proportion surviving each day) | < Carry Cap            | 1                                               |                                              |
|                                                                               | > Carry Cap            | $(CC * \text{Habitable Water}) / (L(t) + P(t))$ |                                              |
| <b>Carrying Capacity : CC<br/>(Maximum larvae/pupae per ml water)</b>         |                        | <b>0.5, 1.0</b>                                 | Barbosa et al. 1972, Moore and Whitacre 1972 |
| Pupae Development: $P_d$<br>(proportion of stage completed per day)           | $T \leq 12, T \geq 39$ | 0                                               | Eisen et al. 2014                            |
|                                                                               | $12 < T < 33$          | $.0014 * T - .0155$                             |                                              |
|                                                                               | $33 \leq T < 39$       | $-0.0004 * T^2 + 0.0286 * T - 0.4777$           |                                              |
| Pupae Survival: $P_s$<br>(Proportion surviving each day)                      | $T \leq 4, T > 39$     | 0                                               | Eisen et al. 2014                            |
|                                                                               | $4 < T < 15$           | $-0.0068 * T^2 + 0.2201 * T - 0.7794$           |                                              |
|                                                                               | $15 \leq T < 33$       | 0.99                                            |                                              |
|                                                                               | $33 \leq T \leq 39$    | $-0.1585 * T + 6.2021$                          |                                              |
| Ovarian Development: $O_d$<br>(proportion of stage completed per day)         | $T \leq 20$            | 0                                               | Christophers 1960, Focks et al. 1993         |
|                                                                               | $T > 20$               | Sharpe and DeMichele                            |                                              |
| <b>Adult Daily Survival Rate: <math>A_s</math><br/>(Daily survival Rate)</b>  | $T < 1, T > 40$        | .01                                             | Muir and Kay 1998, Conway et al. 1974        |
|                                                                               | $1 \leq T \leq 40$     | <b>0.86, 0.88</b>                               |                                              |

|                                                                                                 |                     |                                                                                                                                                                                             |                                                                |
|-------------------------------------------------------------------------------------------------|---------------------|---------------------------------------------------------------------------------------------------------------------------------------------------------------------------------------------|----------------------------------------------------------------|
| Minimum Thermal Oviposition Limit: $O_l$                                                        |                     | 18°C                                                                                                                                                                                        | Christophers 1960                                              |
| Adult Biting Rate: $A_b$                                                                        | $T < 17, T > 39$    | 0                                                                                                                                                                                           | Christophers 1960, Author Observations                         |
| (Proportion of adults that feed)                                                                | $17 \leq T \leq 39$ | $-0.0066 * T^2 + 0.3694 * T - 4.2222$                                                                                                                                                       |                                                                |
| Fertilization Rate (Age: 1, 2, 3 days): $A_f$                                                   | $T < 17$            | 0                                                                                                                                                                                           | Christophers 1960                                              |
|                                                                                                 | $T \geq 17$         | 0.33, 0.5, 1.0                                                                                                                                                                              |                                                                |
| Egg Batch Size: $E_b$                                                                           |                     | 100                                                                                                                                                                                         | Christophers 1960                                              |
| EIP Progress: EIP                                                                               | $T < 21$            | 0                                                                                                                                                                                           | Tjaden et al. 2013                                             |
| (Proportion of EIP complete per day)                                                            | $T \geq 21$         | $(1 / (100.33 * \exp(T * -0.077))) / 24$                                                                                                                                                    |                                                                |
| Vector Infection Probability: $I_v$                                                             | $T < 17$            | 0                                                                                                                                                                                           | Watts et al. 1987                                              |
| (Probability of infection)                                                                      | $T \geq 17$         | $-0.0023 * T^2 + 0.1655 * T - 2.0568$                                                                                                                                                       |                                                                |
| Length of Exposed Stage (days): $H_e$                                                           |                     |                                                                                                                                                                                             | Kuno 1995, Chan and Johansson 2012, Nishiura and Halstead 2007 |
|                                                                                                 |                     | 5                                                                                                                                                                                           |                                                                |
| Length of Infectious Period (days): $H_i$                                                       |                     | 5, 7                                                                                                                                                                                        | Same at $H_e$                                                  |
| Background Infection Rate: $I_b$                                                                |                     | 0.00004, 0.00006, 0.00008                                                                                                                                                                   | Sensitivity Analysis, CDC data                                 |
| (Proportion of infectious humans)                                                               |                     |                                                                                                                                                                                             |                                                                |
| Host Infection Probability: $I_h$                                                               | $T < 21$            | 0                                                                                                                                                                                           | Tjaden et al. 2013                                             |
|                                                                                                 | $21 \leq T \leq 32$ | $(0.0022 * T^2 - 0.0627 * T + 0.6232) * 0.5, 1$                                                                                                                                             |                                                                |
|                                                                                                 | $T > 32$            | 0.5, 1                                                                                                                                                                                      |                                                                |
| Container Height: $C_h$                                                                         |                     | 8cm, 12 cm                                                                                                                                                                                  | Sensitivity Analysis                                           |
| Container Habitat Area (cm <sup>2</sup> ): $C_a$                                                |                     | Low = 8E+6, 10E+6, 12E+6, 14E+6<br>Med Low = 16E+6, 18E+6, 20E+6, 22E+6<br>Med = 24E+6, 26E+6, 28E+6, 30E+6<br>Med High = 40E+6, 50E+6, 60E+6, 70E+6<br>High = 80E+6, 90E+6, 100E+6, 100E+6 | Sensitivity Analysis                                           |
| (All 20 values were used separately but results were grouped into five categories for analysis) |                     |                                                                                                                                                                                             |                                                                |
| Container Habitat Composition: $C_c$                                                            |                     | 0.1, 0.3, 0.5, 0.7, 0.9                                                                                                                                                                     | Sensitivity Analysis                                           |
| (Proportion Open Containers)                                                                    |                     |                                                                                                                                                                                             |                                                                |
| Evaporation (cm/day): $E_v$                                                                     |                     | Hamon's Equation                                                                                                                                                                            | Hamon 1961                                                     |
| Daylight Hours: DL                                                                              |                     | See Reference                                                                                                                                                                               | Forsythe et al. 1995                                           |
| Population: P                                                                                   |                     | 395,326                                                                                                                                                                                     | US Census Bureau                                               |
| Latitude: L                                                                                     |                     | 18.43° N                                                                                                                                                                                    | Weather Station Location                                       |

\*T = Temperature, Eq = Equation
