# Supplementary material for: Meteorologically Driven Simulations of Dengue Epidemics in San Juan, PR
Source: PubMed Central journal article supplement (PMC4537107; doi:10.1371/journal.pntd.0004002), 2015-08-14
Supplement: pntd.0004002.s002.pdf [file pntd.0004002.s002.pdf]

| Populations                                | Equation                                                                                                                      |
|--------------------------------------------|-------------------------------------------------------------------------------------------------------------------------------|
| Eggs: E(t)                                 | $E(t-1) + \Delta A_{g1}(t-1)*E_b + \Delta A_{g2}(t-1)*E_b - \Delta E(t-1) - E(t-1)*(1-E_s(t-1))$                              |
| Larvae: L(t)                               | $L(t-1) + \Delta E(t-1) - L(t-1)*(1-L_s(t-1))*(1-L_{ds}(t-1)) - \Delta L(t-1)$                                                |
| Pupae: P(t)                                | $P(t-1) + \Delta L(t-1) - \Delta P(t-1) - P(t-1)*(1-P_s(t-1))$                                                                |
| Naïve Adults: A <sub>n</sub>               | $A_n(t-1) + \Delta P(t-1) - A_n(t-1)*A_f(t-1)*A_b(t-1) - A_n(t-1)*(1-A_s(t-1))$                                               |
| Gravid Adults: A <sub>g1</sub>             | $A_{g1}(t-1) + A_n(t-1)*A_f(t-1)*A_b(t-1) - \Delta A_{g1}(t-1) - A_{g1}(t-1)*(1-A_s(t-1))$                                    |
| Questing Adults: A <sub>q</sub>            | $A_q(t-1) + \Delta A_{g1}(t-1) + \Delta A_{g2}(t-1) - A_q(t-1)*(1-A_s(t-1)) - A_q(t-1)*A_b(t-1)$                              |
| Gravid Adults: A <sub>g2</sub>             | $A_{g2}(t-1) + A_q(t-1)*A_b(t-1) - \Delta A_{g2}(t-1) - A_{g2}(t-1)*(1-A_s(t-1))$                                             |
| Infected Adults: A <sub>i</sub>            | $A_i(t-1) + A_n(t-1)*A_f(t-1)*A_b(t-1)*I_v(t-1)*H_{ip}(t-1) + A_q(t-1)*A_b(t-1)*I_v(t-1)*H_{ip}(t-1) - A_i(t-1)*(1-A_s(t-1))$ |
| Human Suseptible: H <sub>s</sub>           | $H_s(t-1) - I_h(t-1)*A_q(t-1)*A_{ip}(t-1)*A_b(t-1)*H_{sp}(t-1)$                                                               |
| Human Exposed: H <sub>e</sub>              | $H_e(t-1) + I_h(t-1)*A_q(t-1)*A_{ip}(t-1)*A_b(t-1)*H_{sp}(t-1) - \Delta H_e(t-1)$                                             |
| Human Infectious: H <sub>i</sub>           | $H_i(t-1) + \Delta H_e(t-1) - \Delta H_i(t-1)$                                                                                |
| Human Recoverd: H <sub>r</sub>             | $H_r(t-1) + \Delta H_i(t-1)$                                                                                                  |
| <b>Population Proportions</b>              |                                                                                                                               |
| Infectious Mosquitoes: A <sub>ip</sub> (t) | $\Delta A_i(t-1) / (A_{g1}(t-1) + A_q(t-1) + A_{g2}(t-1))$                                                                    |
| Infectious Humans: H <sub>ip</sub> (t)     | $H_i(t-1) / (H_s(t-1) + H_e(t-1) + H_i(t-1) + H_r(t-1))$                                                                      |
| Susceptible Humans: H <sub>sp</sub> (t)    | $H_s(t-1) / (H_s(t-1) + H_e(t-1) + H_i(t-1) + H_r(t-1))$                                                                      |
| <b>Water Volumes</b>                       |                                                                                                                               |
| Human Managed: W <sub>h</sub>              | $W_h(t-1) + Pr(t-1)*C_a*(1-C_c) - C_a*(1-C_c)*Ev(t-1)*(1/5)$                                                                  |
| Open Containers: W <sub>o</sub>            | $W_o(t-1) + Pr(t-1)*C_a*C_c - C_a*C_c*Ev(t-1)$                                                                                |

Note: If  $H_{ip} < I_b$  then  $I_b$  replaces  $H_{ip}$

$\Delta$  denotes members that have completed the stage

$\Delta A_{g1}$  and  $\Delta A_{g2}$  assumes water is available to lay eggs on/around

Pr = Precipitation

$W_h$  and  $W_o$  will no longer fill once they meet the maximum capacity ( $C_a*(1-C_c)*C_h$  and  $C_a*C_c*C_h$ )
